# Supplementary material for: Epistatic, synthetic, and balancing interactions among tubulin missense mutations affecting neurite growth in Caenorhabditis elegans
Source: PubMed Central journal article supplement — Mol Biol Cell. 2021 Feb 15;32(4):331–47. doi: 10.1091/mbc.E20-07-0492 (PMC8098816; doi:10.1091/mbc.e20-07-0492), 2021-02-15
Supplement: mbc-32-331-s001.pdf [file mbc-32-331-s001.pdf]

# Supplemental Materials

*Molecular Biology of the Cell*

Lee *et al.*

## Supplemental Information

### Supplemental Tables

**Table S1.** A list of *mec-7(u278 neo)* suppressors isolated from the screen.

**Table S2.** *mec-7* and *mec-12* alleles isolated from the *mec-17(lf)* suppressor screen.

**Table S3.** CRISPR/Cas9 target and repair template sequences used to recreate four missense mutations.

### Supplemental Figures

**Figure S1.** Suppression of *mec-17(-)* phenotypes by mutations in *mec-7*.

**Figure S2.** *mec-7* mutations disrupted the transport of synaptic vesicle proteins.

**Figure S3.** Taxol treatment partially rescued neurite growth defects in tubulin *lf* and *anti* mutants.

**Figure S4.** *mec-7* and *mec-12 anti* alleles are epistatic to *mec-7 neo* alleles.

| Gene          | Allele        | Molecular lesion | Recessivity in suppressing ALM-PN | Strain name [with <i>mec-7(u278)</i> ] |
|---------------|---------------|------------------|-----------------------------------|----------------------------------------|
| <i>mec-7</i>  | <i>u1151</i>  | C12Y             | recessive                         | TU6475                                 |
|               | <i>u1152</i>  | G13S             | recessive                         | TU6476                                 |
|               | <i>u1153</i>  | S25F             | semi-dominant                     | TU6477                                 |
|               | <i>u1154</i>  | E69K             | dominant                          | TU6478                                 |
|               | <i>u1155</i>  | G71E             | recessive                         | TU6479                                 |
|               | <i>u1040</i>  | G98E             | recessive                         | TU5152                                 |
|               | <i>u1156</i>  | R121K            | recessive                         | TU6480                                 |
|               | <i>u1157</i>  | G141E            | recessive                         | TU6481                                 |
|               | <i>u1169</i>  | G146E            | recessive                         | TU6537                                 |
|               | <i>u1158</i>  | T149I            | recessive                         | TU6482                                 |
|               | <i>u1159</i>  | Q191*            | recessive                         | TU6483                                 |
|               | <i>u1160</i>  | D203V            | recessive                         | TU6484                                 |
|               | <i>unk22</i>  | A254T            | recessive                         | CGZ46                                  |
|               | <i>u1161</i>  | A302V            | recessive                         | TU6485                                 |
|               | <i>u1170</i>  | P358S            | semi-dominant                     | TU6538                                 |
|               | <i>u1162</i>  | Q384*            | recessive                         | TU6486                                 |
|               | <i>u1171</i>  | R391H            | recessive                         | TU6539                                 |
|               | <i>u1164</i>  | G402R            | recessive                         | TU6488                                 |
| <i>u1163</i>  | 80bp deletion | recessive        | TU6487                            |                                        |
| <i>mec-12</i> | <i>u1172</i>  | G13E             | semi-dominant                     | TU6540                                 |
|               | <i>u1173</i>  | Q133*            | recessive                         | TU6541                                 |
|               | <i>u1174</i>  | G134E            | recessive                         | TU6542                                 |
|               | <i>unk46</i>  | G246E            | semi-dominant                     | TU5153                                 |
|               | <i>u1175</i>  | T257K            | semi-dominant                     | TU6543                                 |
|               | <i>unk23</i>  | G350E            | semi-dominant                     | CGZ47                                  |
|               | <i>u1165</i>  | G354E            | semi-dominant                     | TU6489                                 |
|               | <i>u1176</i>  | E415K            | recessive                         | TU6544                                 |
|               | <i>u1177</i>  | G416E            | recessive                         | TU6545                                 |
| <i>mec-15</i> | <i>u1042</i>  | R26*             | recessive                         | TU5183                                 |
| <i>mbl-1</i>  | <i>u1178</i>  | C86Y             | recessive                         | TU6546                                 |

**Table S1. A list of *mec-7(u278 neo)* suppressors isolated from the screen.**

| Gene          | Allele       | Molecular lesion          | Recessivity in suppressing ALM-PN | Strain name [with <i>mec-17(ok2109)</i> ] |
|---------------|--------------|---------------------------|-----------------------------------|-------------------------------------------|
| <i>mec-7</i>  | <i>u1123</i> | E3K                       | Recessive                         | TU6122                                    |
|               | <i>u1111</i> | Q8*                       | Recessive                         | TU6110                                    |
|               | <i>u1118</i> | S25F                      | Semi-dominant                     | TU6117                                    |
|               | <i>u1120</i> | S25F                      | Semi-dominant                     | TU6119                                    |
|               | <i>u1124</i> | G34S                      | Recessive                         | TU6123                                    |
|               | <i>u1115</i> | R86C                      | Recessive                         | TU6114                                    |
|               | <i>u1122</i> | S145F                     | Recessive                         | TU6121                                    |
|               | <i>u1119</i> | P171L                     | Dominant                          | TU6118                                    |
|               | <i>u1114</i> | G223E                     | Recessive                         | TU6113                                    |
|               | <i>u1110</i> | L225F                     | Semi-dominant                     | TU6109                                    |
|               | <i>u1117</i> | D249N                     | Dominant                          | TU6116                                    |
|               | <i>u1121</i> | Q280*                     | Recessive                         | TU6120                                    |
|               | <i>u1125</i> | Intron 4 splicing variant | Recessive                         | TU6124                                    |
|               | <i>u1147</i> | L311F                     | Recessive                         | TU6407                                    |
|               | <i>u1116</i> | P357S, Q424L              | Recessive                         | TU6115                                    |
| <i>u1113</i>  | G369E        | Recessive                 | TU6112                            |                                           |
| <i>mec-12</i> | <i>u1130</i> | M1I; start loss           | Recessive                         | TU6129                                    |
|               | <i>u1129</i> | A19V                      | Semi-dominant                     | TU6128                                    |
|               | <i>u1131</i> | P63S                      | Recessive                         | TU6130                                    |
|               | <i>u1132</i> | E71K                      | Semi-dominant                     | TU6131                                    |
|               | <i>u1128</i> | S178F                     | Dominant                          | TU6127                                    |
|               | <i>u1126</i> | S236N                     | Dominant                          | TU6125                                    |
|               | <i>u1134</i> | A240T                     | Recessive                         | TU6133                                    |
|               | <i>u1127</i> | S241F                     | Semi-dominant                     | TU6126                                    |
|               | <i>u1135</i> | G246E                     | Semi-dominant                     | TU6134                                    |
| <i>u1133</i>  | R320C        | Semi-dominant             | TU6132                            |                                           |

**Table S2. *mec-7* and *mec-12* alleles isolated from the *mec-17(lf)* suppressor screen.**

| Allele       | Mutation | CRISPR/Cas9 target                 | Repair template ssDNA                                                                                                          |
|--------------|----------|------------------------------------|--------------------------------------------------------------------------------------------------------------------------------|
| <i>unk64</i> | R121K    | 5'-<br>GAGTAAGTTGAAATCCTTGA<br>-3' | 5'-<br>AGCAGAACTTGTAGACAA<br>TGTTCTTGACGTTGTCAAG<br>AAGGAGGCTGAGAGTACT<br>GACTGTCTTCAAGGATTTC<br>AACTTACTCACTCACTTGG<br>AGG-3' |
| <i>unk62</i> | A254T    | 5'-<br>CAATGCGGATCTACGAAAGT<br>-3' | 5'-<br>ACTTGCCTCCGCTTCCCTG<br>GTCAACTCAATGCGGACCT<br>CCGCAAATTAACAGTGAA<br>CATGGTTCCATTCCCACGT<br>CTTCACTTC-3'                 |
| <i>unk60</i> | A302V    | 5'-<br>GCTGCATGCGATCCAAGACA<br>-3' | 5'-<br>ACCCAACAATGTTTCGACG<br>CAAAGAACATGATGGCCG<br>TTTGCGACCCTAGGCATGG<br>ACGTTATCTCACCGCTGCT<br>GCCATTTCCG-3'                |
| <i>unk63</i> | R391H    | 5'-<br>GCCGCAAAGCTTTCCTTCAT-<br>3' | 5'-<br>atTTtgactaatttcataTTTTTccagCTAT<br>GTTTCGGCATAAGGCATTG<br>CTGCATTGGTACACTGGCG<br>AGGGAATGGACGAGATGG<br>A-3'             |

**Table S3. CRISPR/Cas9 target and repair template sequences used to recreate four missense mutations.**

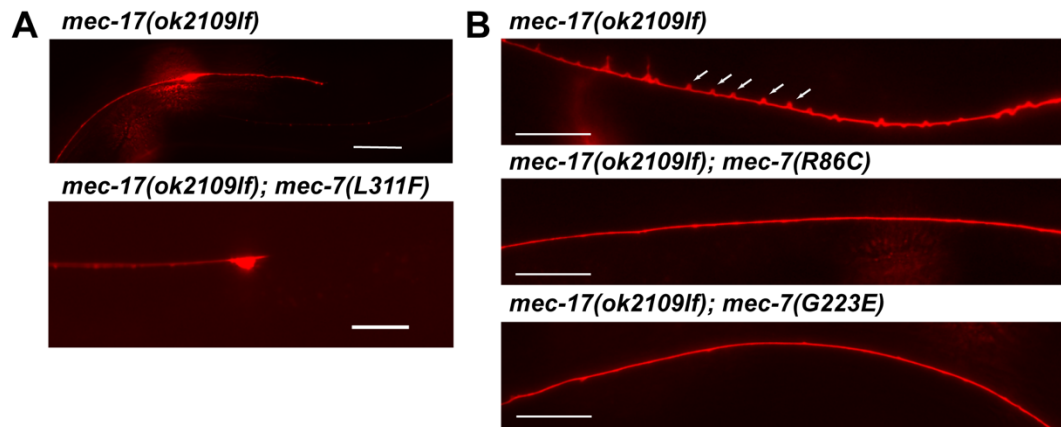

**Figure S1. Suppression of *mec-17(-)* phenotypes by mutations in *mec-7*.** (A) The ectopic ALM-PN in young adults of *mec-17(ok2109)* deletion allele was suppressed by *mec-7* partial *lf* allele carrying L311F mutation. (B) The swelling and looping of ALM-AN in *mec-17(ok2109)* animals were suppressed by *mec-7* weak *neo* mutants.

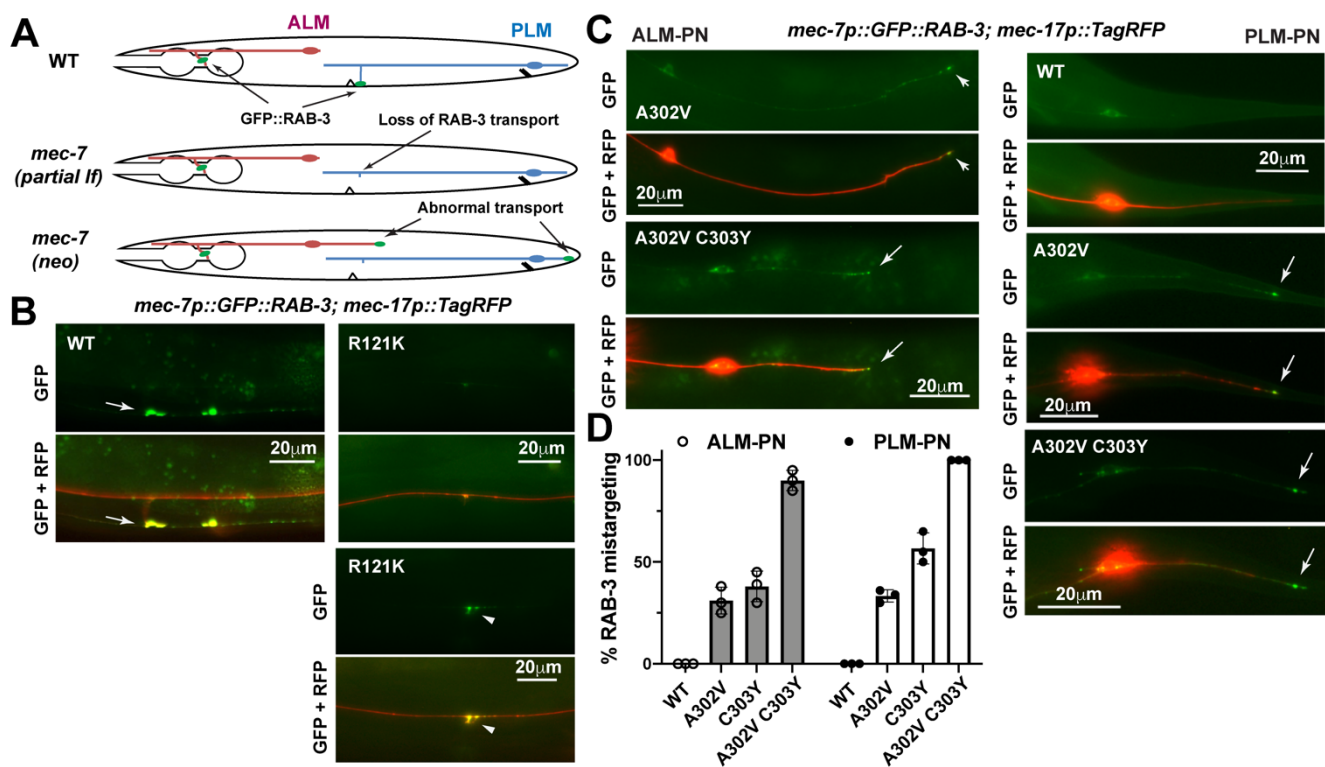

**Figure S2. *mec-7* mutations disrupted the transport of synaptic vesicle proteins.** (A) Schematic diagram for the localization of GFP-fused synaptic vesicle protein RAB-3 in the TRNs in wild-type and *mec-7* mutant animals. (B) In wild-type animals, GFP::RAB-3 in PLM neurons was located at the place where the synaptic branch of PLM-AN contacted the ventral nerve cord (arrows). In *mec-7*(R121K) partial *lf* mutants, the synaptic branch was not made and no GFP::RAB-3 signal was found on the PLM-AN. In some *mec-7*(R121K) animals, PLM-AN grew a very small branch, where weak GFP::RAB-3 signal was observed (arrow heads). (C) In *mec-7*(A302V *neo*) and *mec-7*(A302V C303Y) mutants, GFP::RAB-3 was mistargeted to the terminals (arrows) of the ALM-PN (left panel) and PLM-PN (right panel). (D) The percentages of ALM and PLM neurons that had the mistargeting of GFP::RAB-3 in *mec-7*(A302V *neo*), *mec-7*(C303Y *neo*), and *mec-7*(A302V C303Y) mutants.

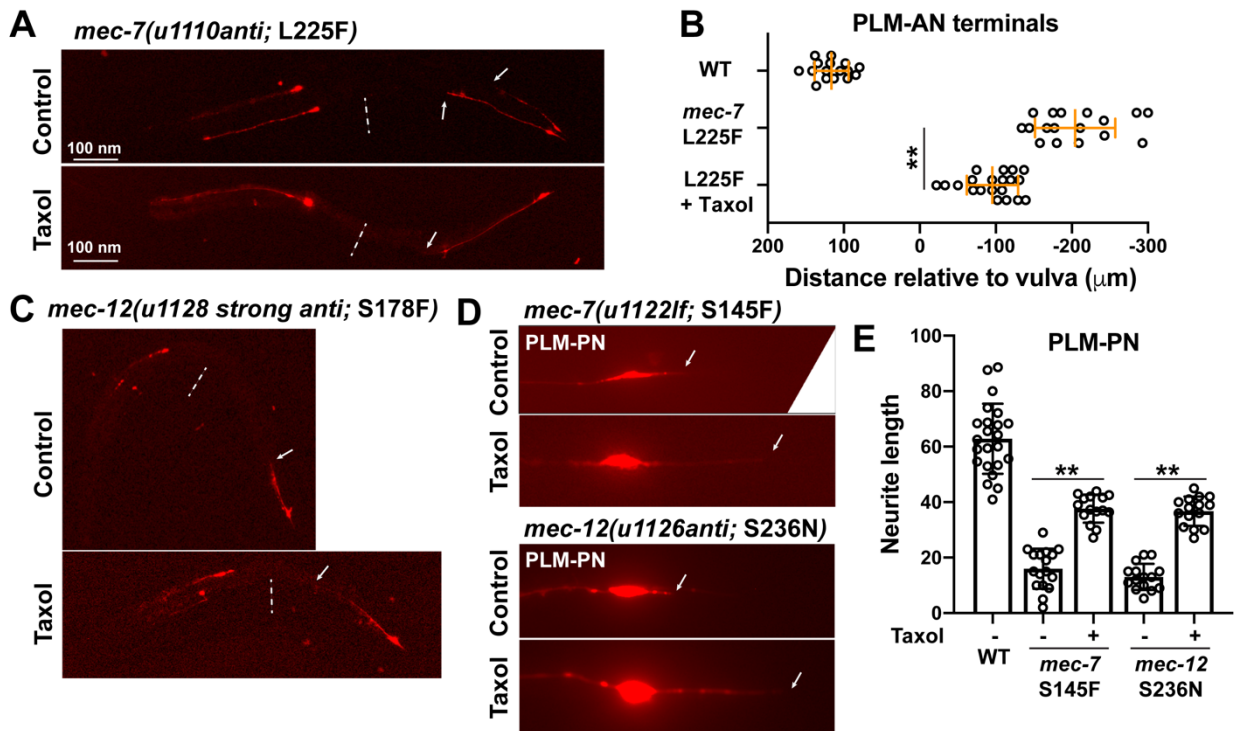

**Figure S3. Taxol treatment partially rescued neurite growth defects in tubulin *lf* and *anti* mutants.** (A) PLM-AN morphology in *mec-7(u1110anti)* mutants treated with 1  $\mu$ M paclitaxel (taxol). Dashed line indicates the position of the vulva and the arrows indicate the PLM-AN terminals. (B) The distance between the vulva and the PLM-AN terminals in *mec-7(u1110anti)* mutants treated with taxol. (C) PLM-AN in *mec-12(u1128 strong anti)* mutants treated 1  $\mu$ M taxol. (D) PLM-PN in *mec-7(u1122lf)* and *mec-12(u1126anti)* mutants treated with 1  $\mu$ M Taxol. Arrows indicated where PLM-PN ends. (E) The length of PLM-PN in the treated *mec-7(u1122lf)* and *mec-12(u1126anti)* mutants. Double asterisks indicate statistically significance difference ( $p < 0.01$ ).



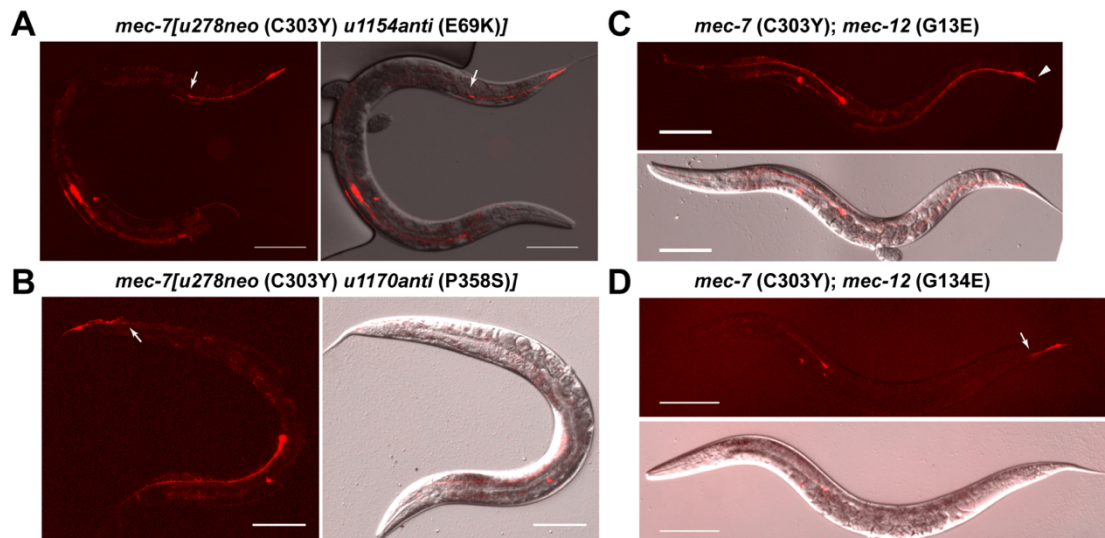

**Figure S4. *mec-7* and *mec-12 anti* alleles are epistatic to *mec-7 neo* alleles.** (A) *mec-7(neo)* and *mec-7(anti)* double mutants showed the shortening of PLM-AN similar to the *mec-7(anti)* single mutants. Arrows point to the premature termination of PLM-AN. (B) *mec-7(neo)* and *mec-12(anti)* showed similar phenotype as the *mec-12(anti)* alleles alone. In top panel, arrow head points to the shortening of PLM-PN seen before in *mec-12(anti)* alleles. In bottom panel, arrow points to the shortening of PLM-AN seen in the newly isolated strong *anti* alleles of *mec-12*. G13E and G134E are representative *anti* and strong *anti* alleles, respectively.
